# Supplementary material
Source: PubMed Central journal article supplement (PMC5500836)
Supplement: NIHMS868261-supplement-Supplemental_Table.pdf [file NIHMS868261-supplement-Supplemental_Table.pdf]

**Supplemental Table 1.** Normalized weighted C-index and bootstrap standard deviation (SD) for best response in the first 6 weeks among BRIM3 patients

| Threshold | C-index | SD    |
|-----------|---------|-------|
| 10%       | 0.155   | 0.070 |
| 20%       | 0.168   | 0.067 |
| 30%       | 0.097   | 0.062 |
| 40%       | 0.029   | 0.050 |
| 50%       | 0.043   | 0.063 |
| 60%       | 0.139   | 0.106 |
